# Supplementary material for: Pioglitazone, a Peroxisome Proliferator-Activated Receptor γ Agonist, Suppresses Rat Prostate Carcinogenesis
Source: MDPI journal article supplement (doi:10.3390/ijms17122071), 2016-12-10
Supplement: s1 [file s1]

## Supplementary Materials: Pioglitazone, a Peroxisome Proliferator-Activated Receptor $\gamma$ Agonist, Suppresses Rat Prostate Carcinogenesis

Shugo Suzuki, Yukiko Mori, Aya Nagano, Aya Naiki-Ito, Hiroyuki Kato, Yuko Nagayasu, Mizuho Kobayashi, Toshiya Kuno and Satoru Takahashi

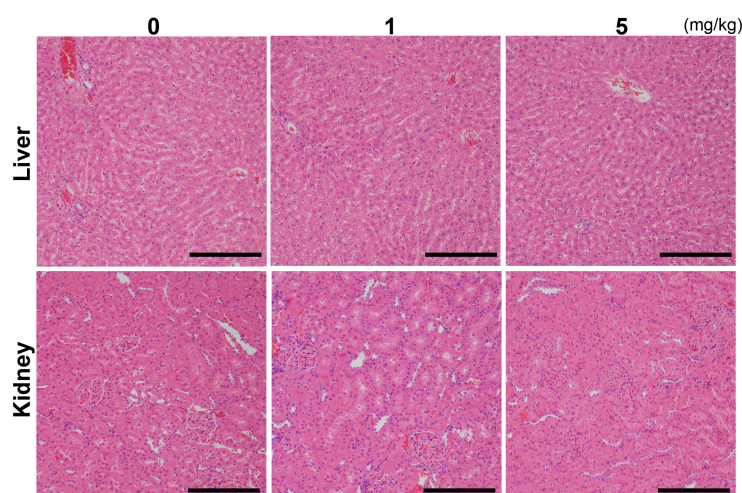

**Figure S1.** Histology of liver and kidney. Representative histopathological findings for lesions in the liver and kidney of the 0 (control), 1 and 5 mg/kg PGZ-treated groups. Scale bars = 200  $\mu$ m.

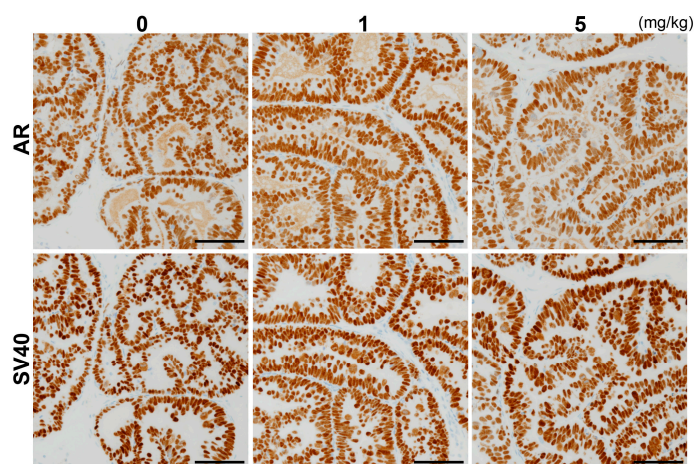

**Figure S2.** Immunohistochemistry of AR and SV40. Representative immunohistochemistry of AR and SV40 in the ventral prostate of the 0 (control), 1 and 5 mg/kg PGZ-treated groups. Scale bars = 50  $\mu$ m.
